# Supplementary material
Source: publisher figshare collection journal article supplement (https://sage.figshare.com/ndownloader/files/11415008)
Supplement: Supplementary file 1 [file 11415008]

## Supplementary documents

Examples of two scan subjected excluded from analysis in this study (Supplementary Fig 1, 2).

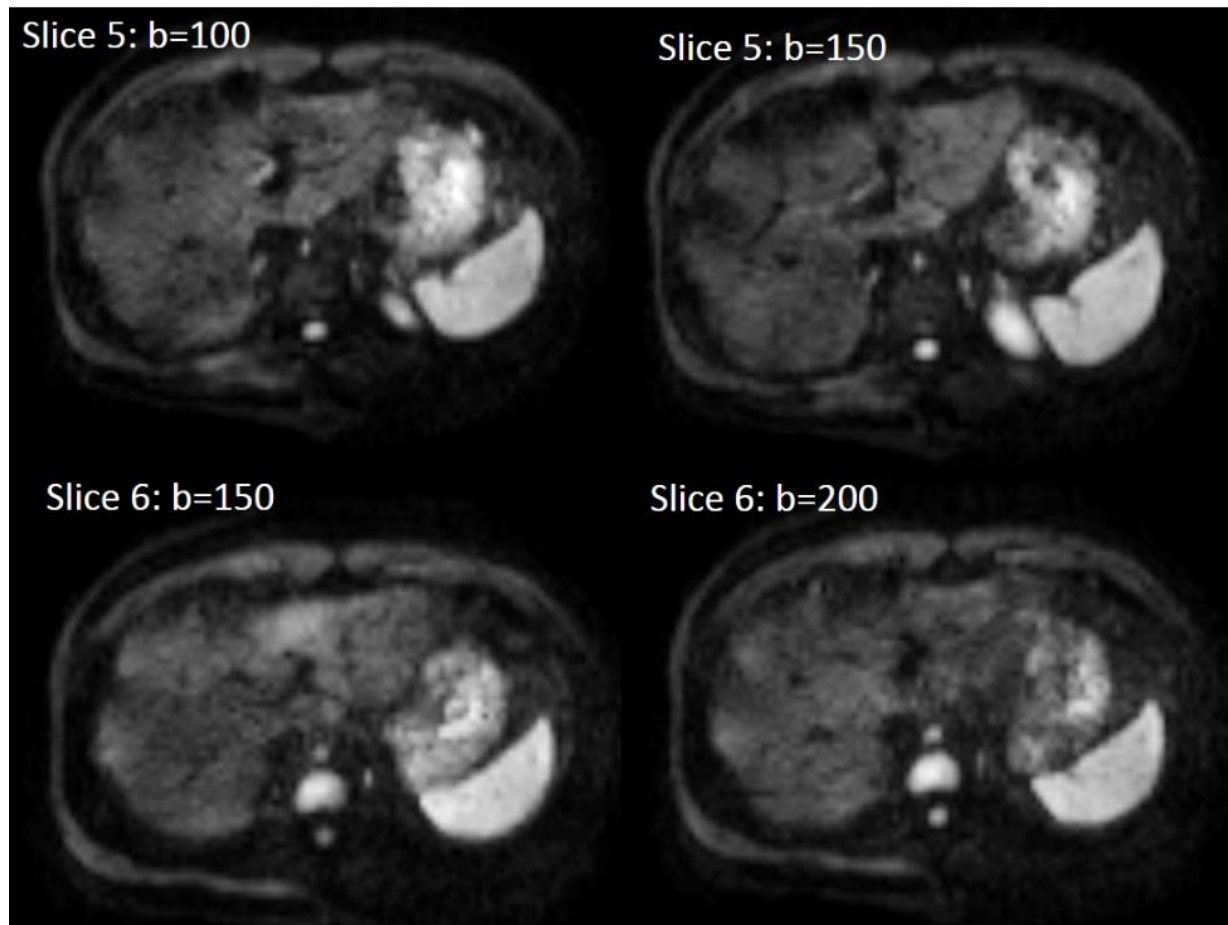

Supplementary Fig 1: Excluded Case 1. There is displacement of liver position among different *b*-values. In addition, signal distortion and inhomogeneity are noted.

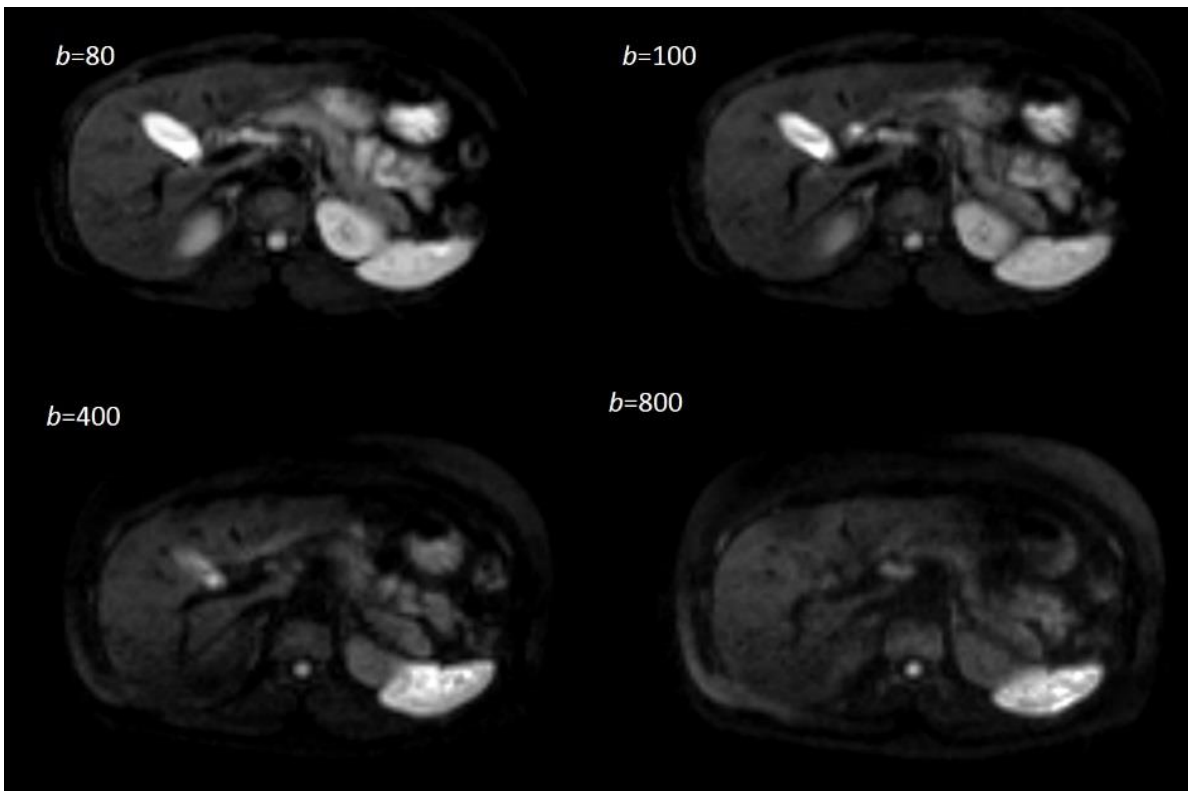

Supplementary Fig 2: Excluded Case 2. There is displacement of liver position among different  $b$ -values. Note the gallbladder shown at  $b$ -value= $80 \text{ s/mm}^2$  is not visible at  $b$ -value= $800 \text{ s/mm}^2$ . In addition, signal inhomogeneity is noted.

# Supplementary document 1:

|                             |            | Threshold b_40  |         |       | Threshold b_60  |       |       | Threshold b_80  |       |       |
|-----------------------------|------------|-----------------|---------|-------|-----------------|-------|-------|-----------------|-------|-------|
|                             |            | F0              | F1      | F2-4  | F0              | F1    | F2-4  | F0              | F1    | F2-4  |
|                             | PF mean    | 0.1             | 0.071   | 0.063 | 0.109           | 0.078 | 0.069 | 0.12            | 0.084 | 0.074 |
|                             | PF SD      | 0.016           | 0.014   | 0.012 | 0.017           | 0.015 | 0.013 | 0.018           | 0.017 | 0.014 |
| difference between F0 vs F1 |            |                 | 0.029   |       |                 | 0.031 |       |                 | 0.036 |       |
|                             | Dslow mean | 1.3             | 1.09    | 1.04  | 1.28            | 1.07  | 1.03  | 1.26            | 1.06  | 1.02  |
|                             | Dslow SD   | 0.23            | 0.11    | 0.12  | 0.22            | 0.11  | 0.12  | 0.21            | 0.11  | 0.12  |
| difference between F0 vs F1 |            |                 | 0.21    |       |                 | 0.21  |       |                 | 0.2   |       |
|                             | Dfast mean | 21.02           | 19.4    | 19.04 | 19.15           | 17.38 | 17.51 | 17.04           | 15.95 | 16.31 |
|                             | Dfast SD   | 3.74            | 3.04    | 3.64  | 3.67            | 2.81  | 4.78  | 3.16            | 2.41  | 5.34  |
| difference between F0 vs F1 |            |                 | 1.62    |       |                 | 1.77  |       |                 | 1.09  |       |
|                             |            | Threshold b_100 |         |       | Threshold b_150 |       |       | Threshold b_200 |       |       |
|                             |            | F0              | F1      | F2-4  | F0              | F1    | F2-4  | F0              | F1    | F2-4  |
|                             | PF mean    | 0.133           | 0.089   | 0.08  | 0.148           | 0.1   | 0.088 | 0.181           | 0.11  | 0.101 |
|                             | PF SD      | 0.023           | 0.016   | 0.015 | 0.031           | 0.016 | 0.015 | 0.055           | 0.016 | 0.021 |
| difference between F0 vs F1 |            |                 | 0.044   |       |                 | 0.048 |       |                 | 0.071 |       |
|                             | Dslow mean | 1.24            | 1.05    | 1.01  | 1.21            | 1.03  | 0.99  | 1.14            | 1.02  | 0.97  |
|                             | Dslow SD   | 0.21            | 0.11    | 0.12  | 0.2             | 0.11  | 0.13  | 0.17            | 0.12  | 0.13  |
| difference between F0 vs F1 |            |                 | 0.19    |       |                 | 0.18  |       |                 | 0.12  |       |
|                             | Dfast mean | 15.51           | 14.93   | 15.37 | 14.05           | 13.31 | 13.82 | 11.92           | 13.03 | 12.12 |
|                             | Dfast SD   | 3.14            | 2.26    | 5.38  | 2.93            | 2.08  | 5.06  | 3.04            | 3.32  | 3.53  |
| difference between F0 vs F1 |            |                 | 0.58    |       |                 | 0.74  |       |                 | -1.11 |       |
| product of PF*Dslow*Dfast   | when b=40  |                 | 0.00987 |       |                 |       |       |                 |       |       |
| product of PF*Dslow*Dfast   | when b=60  |                 | 0.0115  |       |                 |       |       |                 |       |       |
| product of PF*Dslow*Dfast   | when b=80  |                 | 0.00785 |       |                 |       |       |                 |       |       |
| product of PF*Dslow*Dfast   | when b=100 |                 | 0.00485 |       |                 |       |       |                 |       |       |
| product of PF*Dslow*Dfast   | when b=150 |                 | 0.00639 |       |                 |       |       |                 |       |       |

A validation analysis of the support vector machine (SVM) method used in this article. The mean differences between F0 measurement and F1 measurement was computed for PF, Dslow, Dfast, and for threshold b=40, 60, 80, 100, 150, 200 [s/mm<sup>2</sup>] respectively, and then the product of PF\*Dslow\*Dfast was computed for threshold b=40, 60, 80, 100, 150 [s/mm<sup>2</sup>] respectively. In agreement with the support vector machine (SVM) analysis result, threshold b=60 [s/mm<sup>2</sup>] offers the largest PF\*Dslow\*Dfast product.

The mean difference between F0 measurement and F1 measurement of Dfast for threshold b=200 [s/mm<sup>2</sup>] is negative, therefore PF\*Dslow\*Dfast product for threshold b=200 [s/mm<sup>2</sup>] is not calculated.

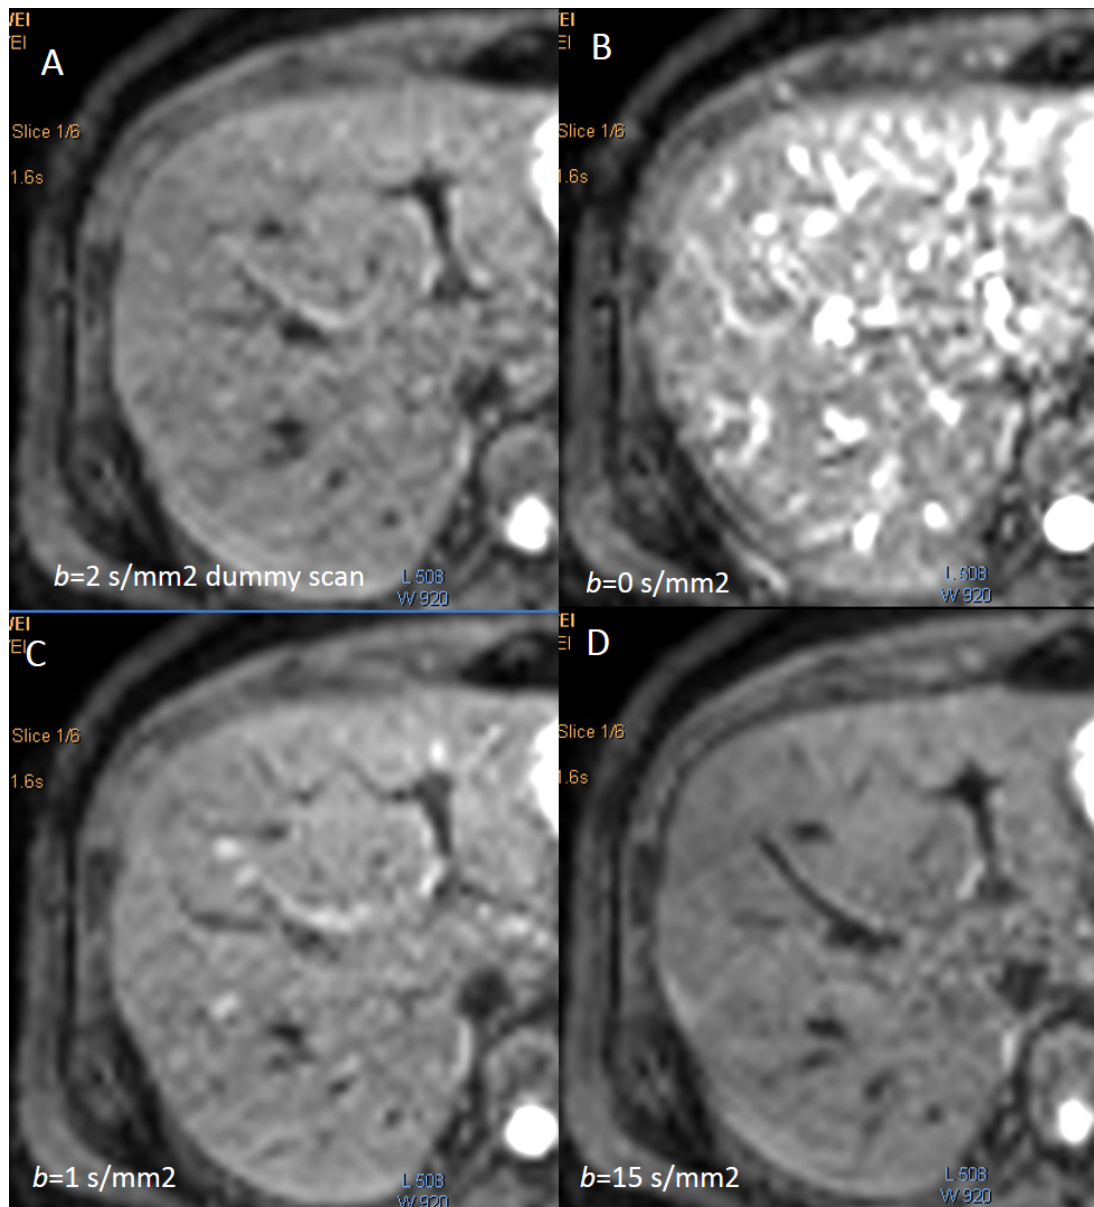

Supplementary Fig 3: Typical liver EPI (echo planar imaging) diffusion images of  $b$ -value of 2 (dummy scan), 0, 1, and 15 ( $\text{s/mm}^2$ , acquired with the same 1.5 Tesla scanner used for the study in this paper).  $b$ -value= 0 image (B) is associated with extensive bright blood signal.
